# Supplementary material for: Methylation signatures in peripheral blood are associated with marked age acceleration and disease progression in patients with primary sclerosing cholangitis
Source: PubMed Central journal article supplement — JHEP Rep. 2019 Dec 5;2(1):100060. doi: 10.1016/j.jhepr.2019.11.004 (PMC7005566; doi:10.1016/j.jhepr.2019.11.004), 2019-12-05
Supplement: mmc1.pdf [file mmc1.pdf]

**Methylation signatures in peripheral blood are associated with  
marked age acceleration and disease progression in patients with  
primary sclerosing cholangitis**

Michael Trauner, Yevgeniy Gindin, Zhaoshi Jiang, Chuhan Chung, G. Mani  
Subramanian, Robert P. Myers, Aliya Gulamhusein, Kris V. Kowdley, Cynthia Levy,  
Zachary Goodman, Michael P. Manns, Andrew J. Muir, Christopher L. Bowlus

Table of contents

|               |   |
|---------------|---|
| Table S1..... | 2 |
| Fig. S1.....  | 3 |

**Table S1. Demographic characteristics of the healthy cohort**

|                        | <b>Healthy Cohort<br/>(N=50)</b> |
|------------------------|----------------------------------|
| Median age, y (Q1, Q3) | 53.5 (47, 58)                    |
| Female, n (%)          | 14 (28)                          |

**Fig. S1**

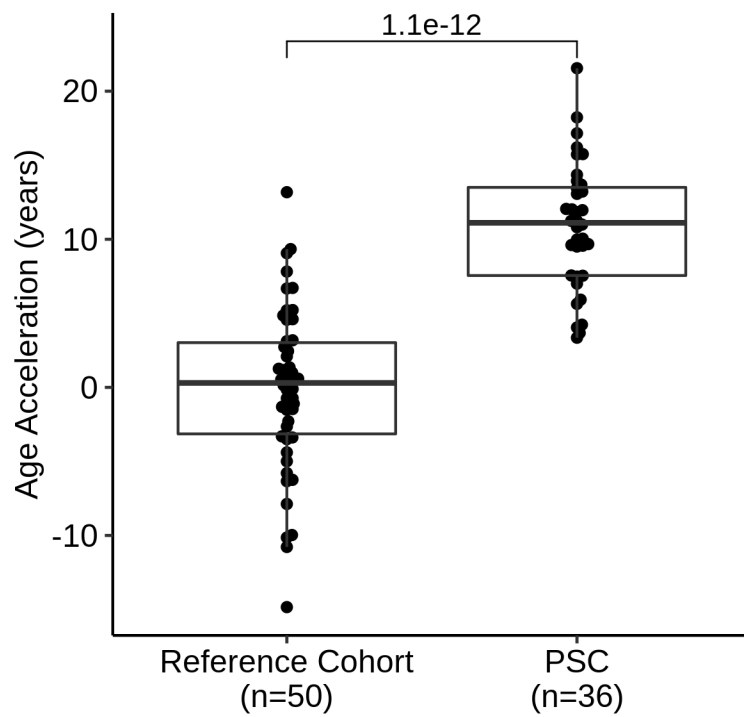

**Fig. S1. Age acceleration in patients with PSC and a reference cohort of healthy individuals.** Age acceleration, the difference between DNAm and chronological age, plotted for PSC patients and an age and sex-matched healthy cohort.
